# Supplementary material for: Statistical and microbial analysis of bio-electrochemical sensors used for carbon monitoring at water resource recovery facilities
Source: Royal Society of Chemistry journal article supplement (doi:10.1039/d1ew00653c), 2022-01-01
Supplement: d1ew00653c1.pdf [file d1ew00653c1.pdf]

**Supplementary Information for “Statistical and Microbial Analysis of Bio-electrochemical Sensors Used for Carbon Monitoring at Water Resource Recovery Facilities”**

Seyed Aryan Emaminejad<sup>a</sup>, Victoria Morgan<sup>a</sup>, Kuldip Kumar<sup>c</sup>, Avanti Kavathekar<sup>c</sup>, Colin Ragush<sup>b</sup>, Weitao Shuai<sup>d</sup>, Zhen Jia<sup>d</sup>, Ray Huffaker<sup>e</sup>, George Wells<sup>d</sup>, Roland D. Cusick<sup>a,\*</sup>

<sup>a</sup>Department of Civil and Environmental Engineering, University of Illinois at Urbana-Champaign, Urbana, IL 61801, USA

<sup>b</sup>Island Water Technologies, Charlottetown, Prince Edward Island, Canada

<sup>c</sup>Metropolitan Water Reclamation District of Greater Chicago, Chicago, IL 60611, USA

<sup>d</sup>Department of Civil and Environmental Engineering, Northwestern University, Evanston, IL 60208, USA

<sup>e</sup>Department of Agricultural and Biological Engineering, University of Florida, Gainesville, FL 32603, USA

\* Corresponding author email: [rcusick@illinois.edu](mailto:rcusick@illinois.edu), phone: +1(217) 244-6727

**Table S1.** Fourier power spectrum for minute sampling and daily sampling of MET data

| <b>MET Minute Sampling</b> |                          |
|----------------------------|--------------------------|
| Cycle Length<br>(minutes)  | Frequency<br>(1/minutes) |
| 5044                       | 1.98E-04                 |
| 9104                       | 1.10E-04                 |
| 10088                      | 9.91E-05                 |
| 16966                      | 5.89E-05                 |
| 20736                      | 4.82E-05                 |

| <b>MET Daily Sampling</b> |                       |
|---------------------------|-----------------------|
| Cycle Length<br>(days)    | Frequency<br>(1/days) |
| 3.51                      | 0.28515               |
| 4.57                      | 0.21875               |
| 7.11                      | 0.14063               |
| 11.1                      | 0.08984               |
| 12.8                      | 0.07813               |

| <b>DO Hourly Sampling</b> |                        |
|---------------------------|------------------------|
| Cycle Length<br>(minutes) | Frequency<br>(1/hours) |
| 24.03                     | 0.0416                 |
| 94.7                      | 0.0106                 |
| 156.3                     | 0.0064                 |
| 168.9                     | 0.0059                 |
| 260.4                     | 0.0038                 |

| <b>DO Daily Sampling</b> |                       |
|--------------------------|-----------------------|
| Cycle Length<br>(days)   | Frequency<br>(1/days) |
| 4                        | 0.25                  |
| 6.56                     | 0.1523                |
| 6.92                     | 0.1445                |
| 11.1                     | 0.0898                |
| 15.1                     | 0.0664                |

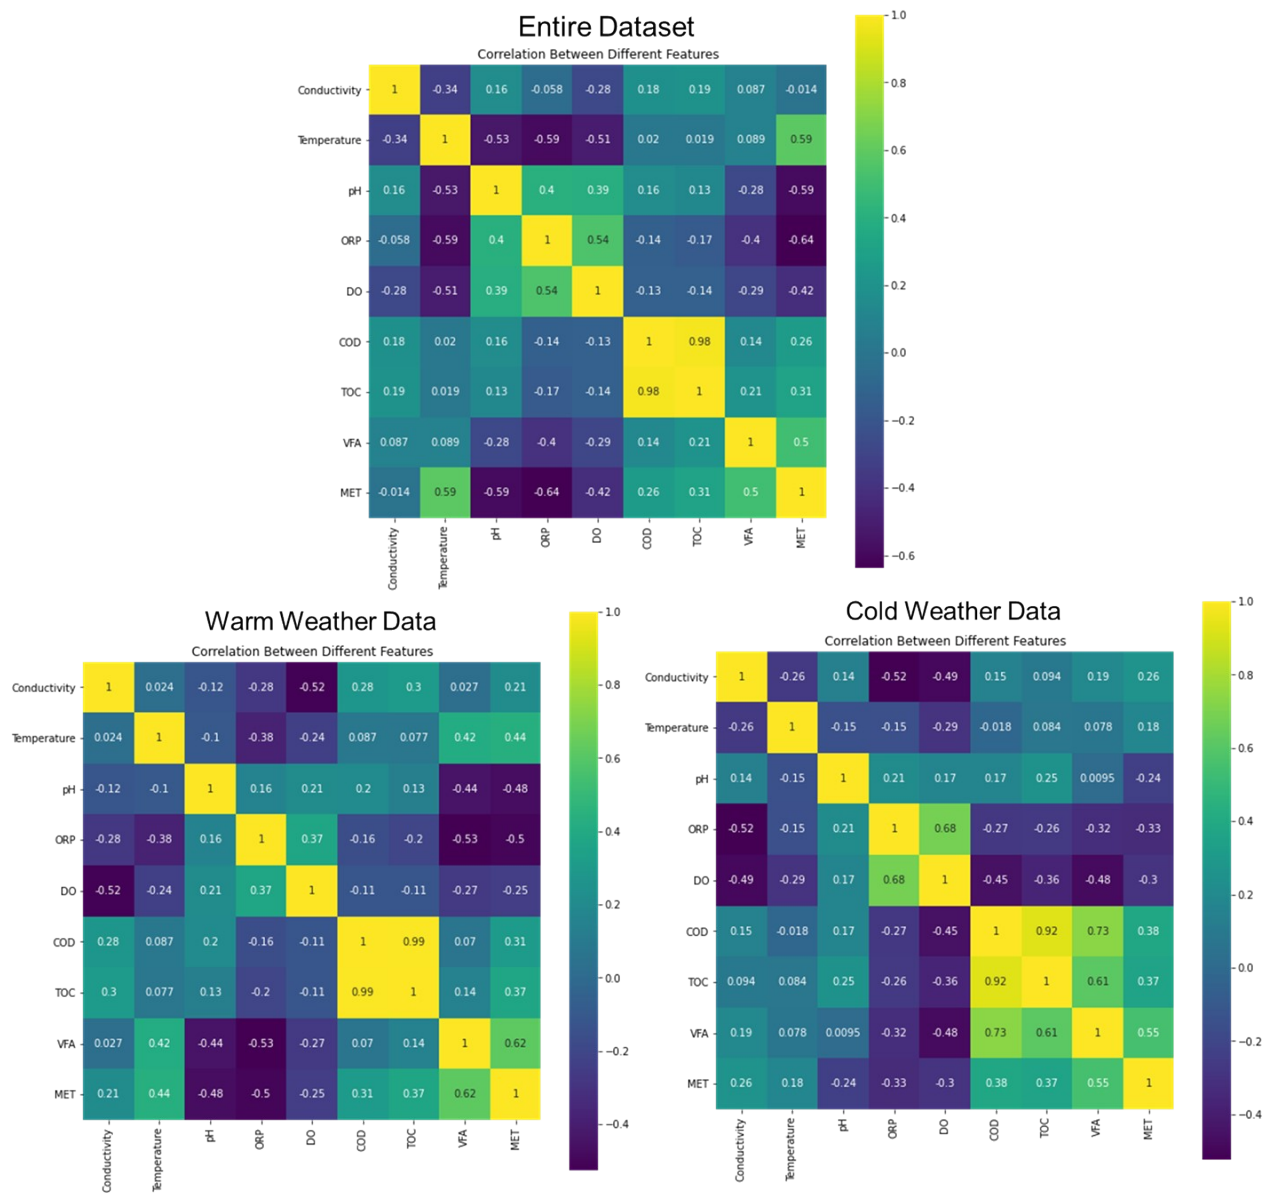

**Figure S1.** Pearson's correlation analysis of the entire dataset and warm/cold weather data.

Entire Dataset

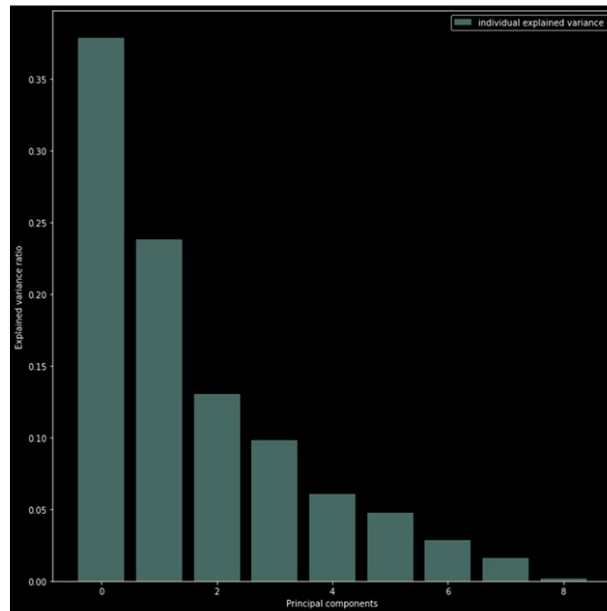

Warm Weather Data

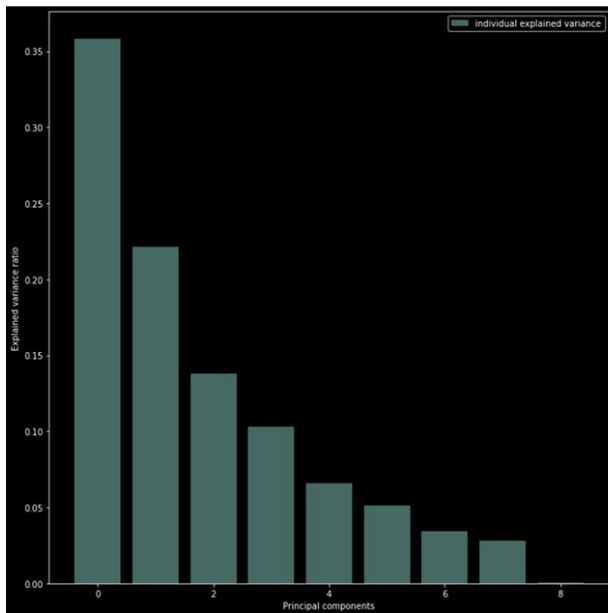

Cold Weather Data

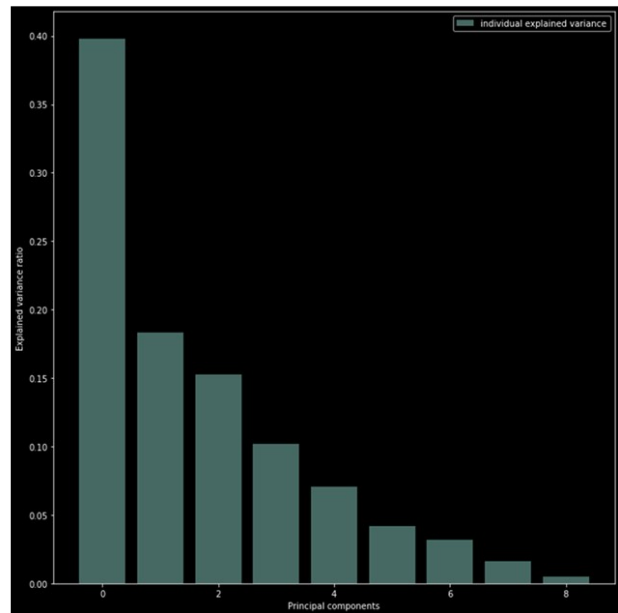

Figure S2. Percentage of the total variance explained by each principal component in the entire dataset and warm/cold weather data.

**Table S2.** On-site grab sample measurements

|            | NO2+NO3_N | NH3_N  | COD  | TOC   | Acetic Acid | Iso-Butyric Acid | N-Butyric Acid | Propionic Acid | VOL ACIDS |
|------------|-----------|--------|------|-------|-------------|------------------|----------------|----------------|-----------|
| Date       | mg/L      | mg/L   | mg/L | mg/L  | mg/L        | mg/L             | mg/L           | mg/L           | mg/L      |
| 6/20/2019  | 0.759     | 9.59   | 42   | 10    | 0.3         | 0                | 0              | 0              | <5        |
| 6/25/2019  | <0.250    | 16.38  | 90   | 29.8  | 29.3        | 0.6              | 0.6            | 4.6            | 35        |
| 6/27/2019  | <0.250    | 11.98  | 75   | 19.4  | 2.3         | 0.3              | 0.3            | 0.8            | <5        |
| 7/2/2019   | <0.250    | 14.97  | 181  | 62.8  | 36.5        | 0.9              | 2.7            | 7.5            | 48        |
| 7/9/2019   | <0.250    | 23.45  | 75   | 24.5  | 18.5        | 0.5              | 0.4            | 0.8            | 20        |
| 7/11/2019  | <0.250    | 22.30  | 106  | 32.4  | 24.4        | 0.5              | 0.6            | 1.7            | 27        |
| 7/16/2019  | 2.372     | 15.18  | 162  | 48.7  | 45.3        | 1.3              | 1.8            | 7.4            | 56        |
| 7/18/2019  | <0.250    | 2.697  | 30   | 7.5   | 0           | 0.6              | 0              | 0              | <5        |
| 7/23/2019  | <0.250    | 11.894 | 58   | 10.8  | 4.9         | 0.6              | 0              | 0              | 6         |
| 7/25/2019  | <0.250    | 22.006 | 131  | 43    | 30.8        | 0.6              | 0.5            | 3.6            | 36        |
| 7/30/2019  | <0.250    | 26.898 | 152  | 59.2  | 32.4        | 0.7              | 0.9            | 2.3            | 36        |
| 8/1/2019   | <0.250    | 23.06  | 1667 | 413.9 | 5.3         | 1                | 2.4            | 6.8            | 16        |
| 8/6/2019   | <0.250    | 10.484 | 301  | 96.9  | 36.2        | 1                | 1.8            | 1.8            | 41        |
| 8/8/2019   | <0.250    | 17.388 | 200  | 50.3  | 58.7        | 1.1              | 3.1            | 9.9            | 73        |
| 8/13/2019  | 0.325     | 9.261  | 104  | 29.2  | 12.4        | 0.9              | 0.7            | 0.8            | 15        |
| 8/22/2019  | <0.250    | 7.256  | 180  | 47.7  | 30.7        | 0.8              | 2              | 5.1            | 39        |
| 8/27/2019  | 0.287     | 10.106 | 65   | 16.9  | 12.1        | 0.8              | 0.7            | 1.5            | 15        |
| 8/29/2019  | <0.250    | 12.364 | 86   | 26.1  | 15.5        | 0.9              | 1.3            | 4.2            | 22        |
| 9/3/2019   | <0.250    | 13.676 | 131  | 43.4  | 14.9        | 0.6              | 0.8            | 1.8            | 18        |
| 9/5/2019   | <0.250    | 11.525 | 105  | 33.1  | 26          | 0.7              | 1              | 2.3            | 30        |
| 9/10/2019  | <0.250    | 17.538 | 253  | 98.6  | 78.6        | 1.2              | 1              | 7.4            | 88        |
| 9/12/2019  | <0.250    | 12.089 | 129  | 37.7  | 27          | 0.4              | 0.6            | 3.3            | 31        |
| 9/17/2019  | <0.250    | 13.164 | 118  | 33.8  | 25.4        | 0.9              | 0.2            | 3.7            | 30        |
| 9/24/2019  | <0.250    | 8.981  | 84   | 25.7  | 13.7        | 0.2              | 0.6            | 1.3            | 16        |
| 9/26/2019  | 0.308     | 7.242  | 65   | 16.1  | 12.5        | 0.6              | 0.7            | 1              | 15        |
| 10/1/2019  | 1.086     | 5.183  | 55   | 12.6  | 4.6         | 0                | 0              | 0              | 5         |
| 10/3/2019  | 1.493     | 3.648  | 60   | 12.5  | 1.2         | 0                | 0.3            | 0.3            | <5        |
| 10/8/2019  | <0.250    | 7.427  | 71   | 30.1  | 13.3        | 0.3              | 0.9            | 2              | 17        |
| 10/10/2019 | <0.250    | 14.149 | 109  | 29.5  | 19.8        | 0.4              | 0.6            | 2.6            | 23        |
| 10/15/2019 | <0.250    | 6.201  | 256  | 85.7  | 8.1         | 0                | 1              | 1.7            | 11        |
| 10/17/2019 | <0.250    | 19.042 | 243  | 96.3  | 13.8        | 0.4              | 0.7            | 0.7            | 16        |
| 10/22/2019 | <0.250    | 11.698 | 160  | 50.3  | -           | -                | -              | -              | -         |
| 10/24/2019 | <0.250    | 18.796 | 333  | 109.5 | 45.2        | 0.8              | 3.1            | 6.8            | 56        |
| 10/29/2019 | 1.001     | 5.72   | 51   | 16    | 0.8         | 0.8              | 0              | 0              | <5        |
| 10/31/2019 | 1.02      | 5.044  | 72   | 20.6  | 1.1         | 0                | 0.7            | 0              | <5        |
| 11/5/2019  | <0.250    | 6.432  | 91   | 27.6  | 6.2         | 0                | 1              | 2              | 9         |
| 11/7/2019  | <0.250    | 7.311  | 110  | 34.1  | 8.9         | 0                | 1.2            | 2.7            | 13        |

|            |        |        |     |       |      |     |     |      |    |
|------------|--------|--------|-----|-------|------|-----|-----|------|----|
| 11/12/2019 | <0.250 | 10.1   | 93  | 26.2  | 13.1 | 0.8 | 1   | 2.3  | 17 |
| 11/14/2019 | <0.250 | 11.061 | 171 | -     | -    | -   | -   | -    | -  |
| 11/19/2019 | <0.250 | 19.081 | 168 | 49.4  | 20.1 | 0.9 | 1.2 | 7.9  | 30 |
| 11/21/2019 | 0.524  | 10.659 | 108 | 29.6  | 4.6  | 0   | 1   | 1.8  | 7  |
| 11/26/2019 | 0.437  | 13.397 | 183 | 67.2  | 29.9 | 0.7 | 1   | 10.1 | 42 |
| 12/3/2019  | 1.867  | 11.297 | 183 | 58.3  | 10.7 | 0   | 0.7 | 4.8  | 16 |
| 12/5/2019  | 0.416  | 16.658 | 157 | 45.2  | 23.7 | 0.4 | 1.4 | 9.2  | 35 |
| 12/10/2019 | <0.250 | 16.983 | 286 | 97.8  | 24.9 | 0.5 | 2.4 | 5.7  | 34 |
| 12/17/2019 | <0.250 | 18.82  | 138 | 45    | 17.2 | 0.6 | 1.1 | 3.6  | 23 |
| 1/7/2020   | 0.752  | 27.25  | 221 | 77.6  | 43.6 | 0.7 | 1.1 | 3.6  | 49 |
| 1/9/2020   | 1.034  | 23.978 | 305 | 98.1  | 32.2 | 0.6 | 0.6 | 1.8  | 35 |
| 1/14/2020  | 0.479  | 8.483  | 63  | 15.9  | 1.6  | 0.2 | 0.3 | 0.4  | <5 |
| 1/16/2020  | 0.5    | 9.491  | 153 | 43.9  | 8.3  | 0.2 | 0.5 | 11   | 20 |
| 1/21/2020  | 0.715  | 21.518 | 305 | 104   | 19.6 | 0.6 | 0.9 | 19.8 | 41 |
| 1/23/2020  | 0.456  | 29.19  | 327 | 102.4 | 9.7  | 1.2 | 1   | 27.9 | 40 |
| 1/28/2020  | 1.388  | 13.105 | 205 | 65.5  | 27.6 | 0.4 | 0.7 | 12   | 41 |
| 1/30/2020  | 0.259  | 18.562 | -   | 72.5  | 26.8 | 0.5 | 1   | 17.4 | 46 |
| 2/4/2020   | 1.092  | 14.271 | 145 | 8.7   | 14   | 0.7 | 1.1 | 5.6  | 21 |
| 2/6/2020   | <0.250 | 14.563 | 146 | 40    | 15.9 | 0.5 | 0.3 | 3.1  | 20 |
| 2/11/2020  | 0.431  | 15.59  | 201 | 32.1  | 41.7 | 0.3 | 0.6 | 5.9  | 49 |
| 2/18/2020  | <0.250 | 12.852 | 153 | 47    | 17.3 | 0.6 | 0.9 | 5.3  | 24 |
| 2/20/2020  | 0.622  | 21.72  | 213 | 81.1  | 14.6 | 0.6 | 1   | 2.5  | 19 |
| 2/25/2020  | <0.250 | 14.77  | 174 | 51.1  | -    | -   | -   | -    | -  |
| 2/27/2020  | 1.185  | 23.22  | 354 | -     | -    | -   | -   | -    | -  |

- Note: Measurement events with missing data points were not included in the final data analysis.
